# Supplementary material for: Gold Incorporated Mesoporous Silica Thin Film Model Surface as a Robust SERS and Catalytically Active Substrate
Source: MDPI journal article supplement (doi:10.3390/molecules21050667), 2016-05-20
Supplement: s1 [file s1]

# Supplementary Materials: Gold Incorporated Mesoporous Silica Thin Film Model Surface as a Robust SERS and Catalytically Active Substrate

Anandakumari Chandrasekharan Sunil Sekhar and Chathakudath Prabhakaran Vinod

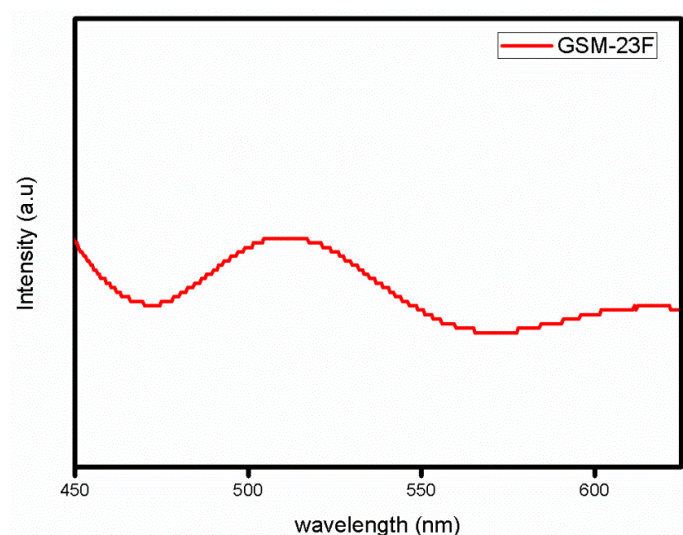

Figure S1. Solid state UV-Vis spectra of the GSM-23F thin film synthesized on an FTO plate.

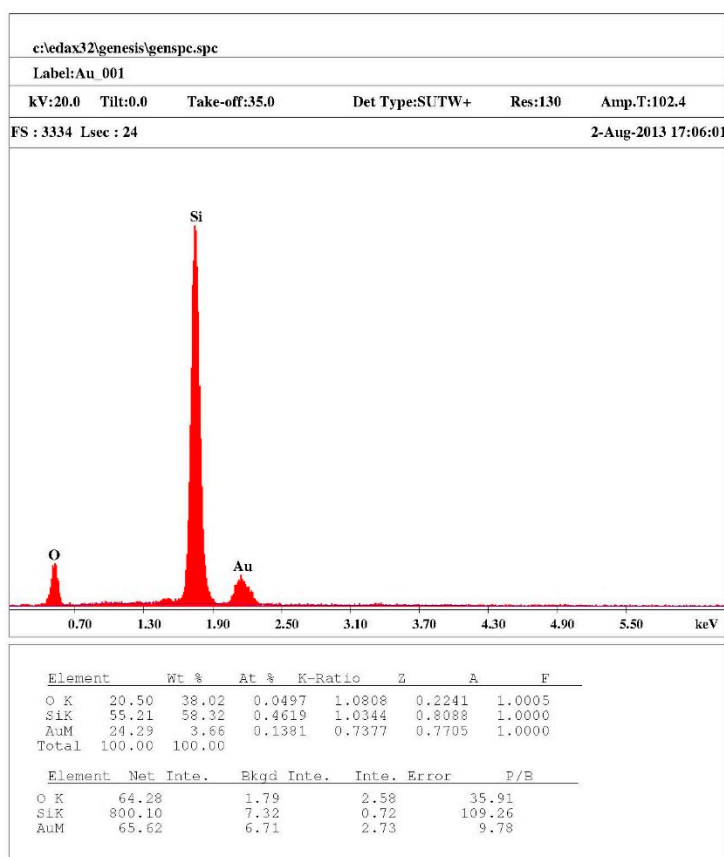

Figure S2. EDX analysis data of the GSM-23F thin film showing the loading of approximately 25 wt % of gold in our thin films which matches well with the ICP-AES analysis.

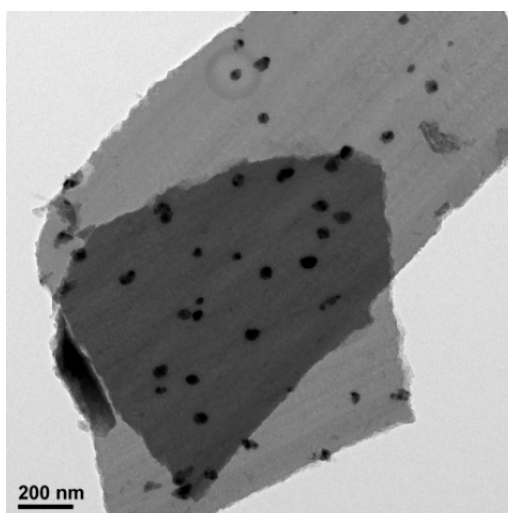

**Figure S3.** Transmission Electron microscopy image of the GSM-23F thin film showing completely flat film surface with larger gold crystallites.

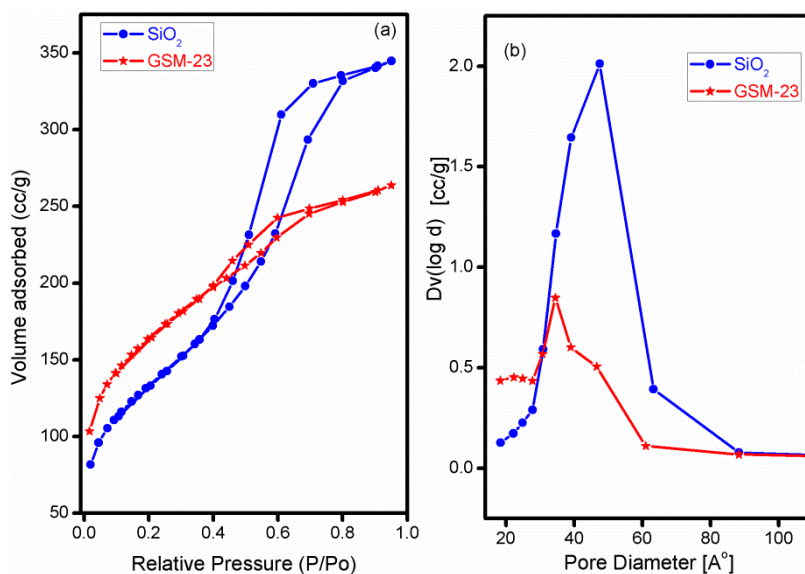

**Figure S4.** Surface area (a) and pore size distribution (b) of the bulk counterparts of mesoporous silica and the GSM-23 [1].

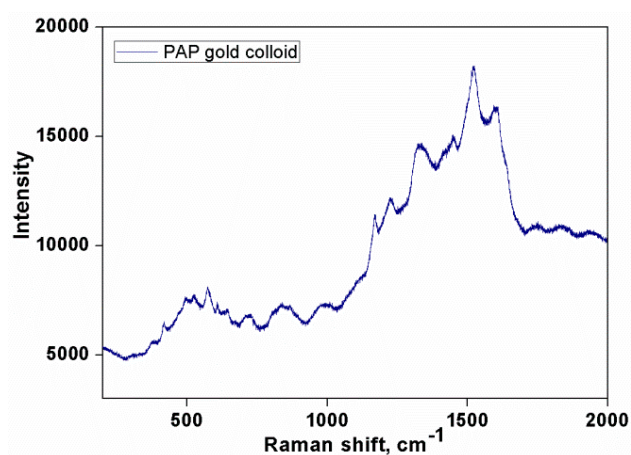

**Figure S5.** Raman spectral data of 4-aminophenol with Au nanoparticle colloid under 633 nm laser source.

## Reference

1. Sunil Sekhar, A.C.; Sivaranjani, K.; Gopinath, C.S.; Vinod, C.P. A simple one pot synthesis of nano gold–mesoporous silica and its oxidation catalysis. *Catal. Today* **2012**, *198*, 92–97.
